# Supplementary material
Source: publisher figshare collection journal article supplement (https://acs.figshare.com/ndownloader/files/12789173)
Supplement: Supplementary file 1 [file 12789173]

# Photoresponse of Graphene-gated Graphene-GaSe Heterojunction Devices

*Wonjae Kim,<sup>†</sup> Sanna Arpiainen,<sup>†,\*</sup> Hui Xue,<sup>‡</sup> Miika Soikkeli,<sup>†</sup> Mei Qi,<sup>‡</sup> Zhipei Sun,<sup>‡,⊥</sup> Harri Lipsanen,<sup>‡</sup> Ferney A. Chaves,<sup>§</sup> David Jiménez,<sup>§</sup> and Mika Prunnila,<sup>†</sup>*

<sup>†</sup>VTT Technical Research Center of Finland Ltd, 02150 Espoo, Finland

<sup>‡</sup>Department of Electronics and Nanoengineering, Aalto University, Tietotie 3, 02150 Espoo, Finland

<sup>§</sup>Department d'Enginyeria Electrònica, Escola d'Enginyeria, Universitat Autònoma de Barcelona, Campus UAB, E-08193 Bellaterra, Spain

<sup>⊥</sup>QTF Centre of Excellence, Department of Applied Physics, Aalto University, FI-00076 Aalto, Finland

[sanna.arpiainen@vtt.fi](mailto:sanna.arpiainen@vtt.fi)

## 1. Device I

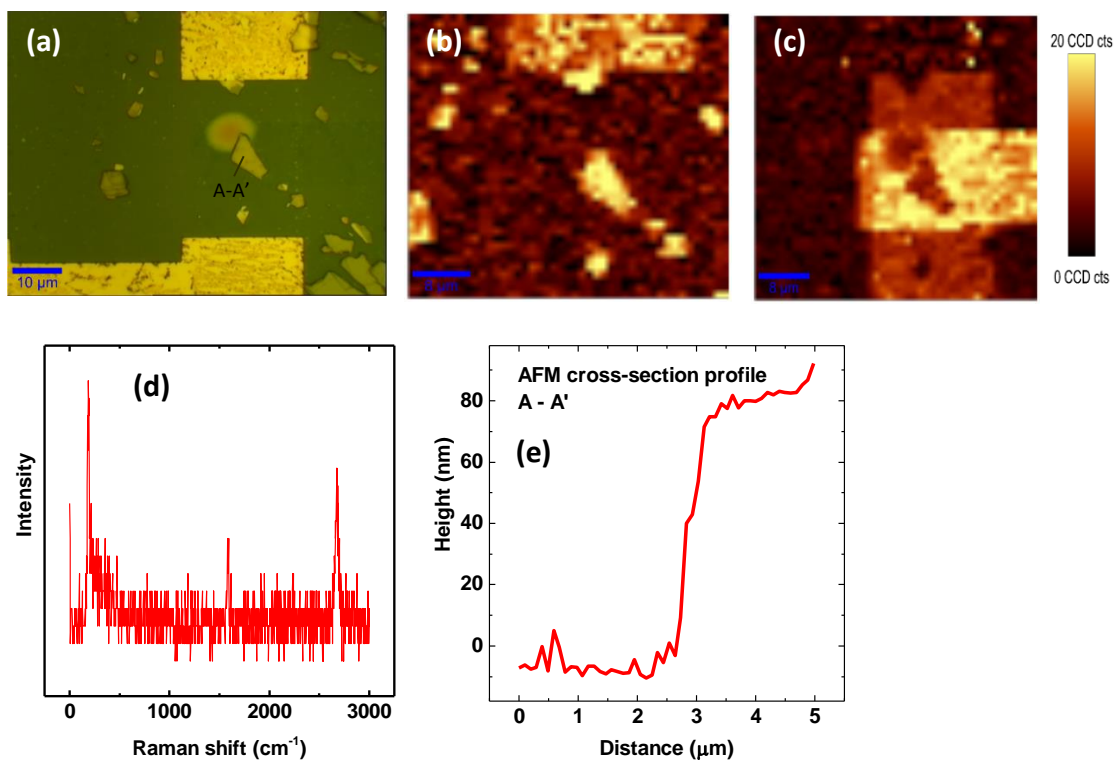

**Figure S-1.** Device I. (a) Optical image and Raman map for the peak of (b) GaSe appearing at  $\sim 212\text{ cm}^{-1}$  ( $E_{12g}$ ) and of (c) the graphene at  $\sim 2680\text{ cm}^{-1}$  (2D). (d) Raman spectra corresponding to the point of the S/D area. (e) Height profile measured by AFM along the A-A' line in (a).

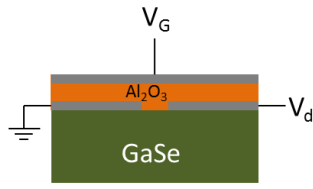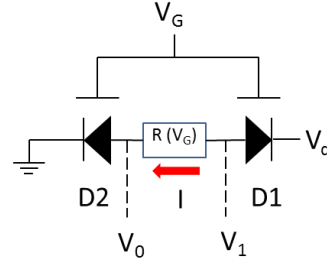

$T = 300 \text{ K}$   
 $T_{\text{ox}} = 30 \text{ nm}$   
 $\epsilon_{\text{ox}} = 8.9$   
 $\epsilon_{\text{GaSe}} = 7$   
 $N_a = 1e10 \text{ cm}^{-3}$   
 $N_v = 2.21e17 \text{ cm}^{-3}$   
 $W_g = 4.5 \text{ eV}$   
 $E_{\text{gap}} = 2.1 \text{ eV}$   
 $\chi_{\text{GaSe}} = 3.24 \text{ eV}$

### Diode equations

$$I_2 = I_0 \exp(-\phi_{b2}/kT) \exp(qV_0/\eta_2 kT) (1 - \exp(-qV_0/kT))$$

$$I_1 = I_0 \exp(-\phi_{b1}/kT) \exp(q(V_1 - V_d)/\eta_1 kT) (1 - \exp(-q(V_1 - V_d)/kT))$$

### Circuit laws

$$-I_1 = I_2 = I$$

$$V_1 - V_0 = IR$$

### Remark

$\phi_{b1}$  and  $\phi_{b2}$  are determined following the procedure in Refs. (24) and (35) in the main text, taking into account possible Fermi level pinning.

### Band diagram of the MOGS heterostructure

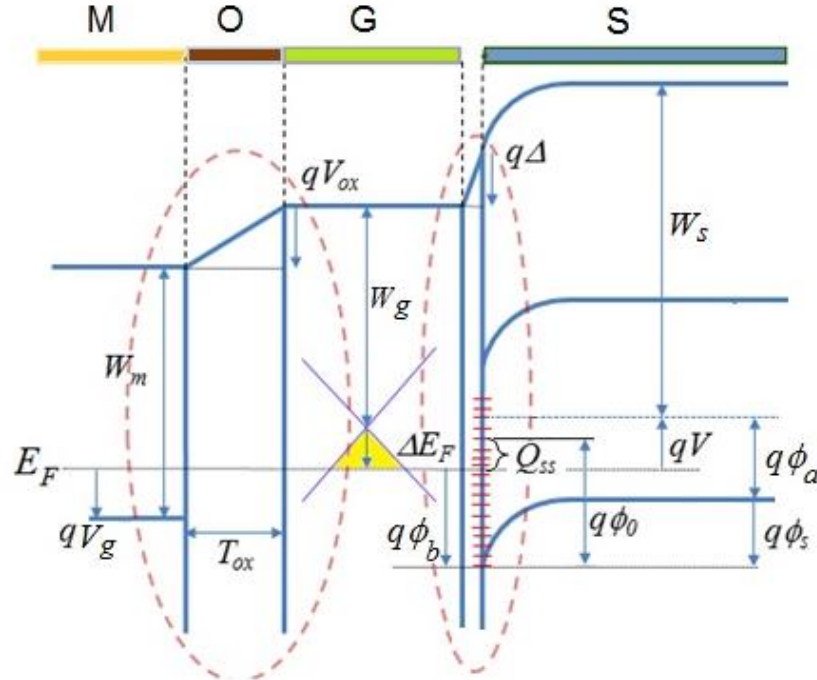

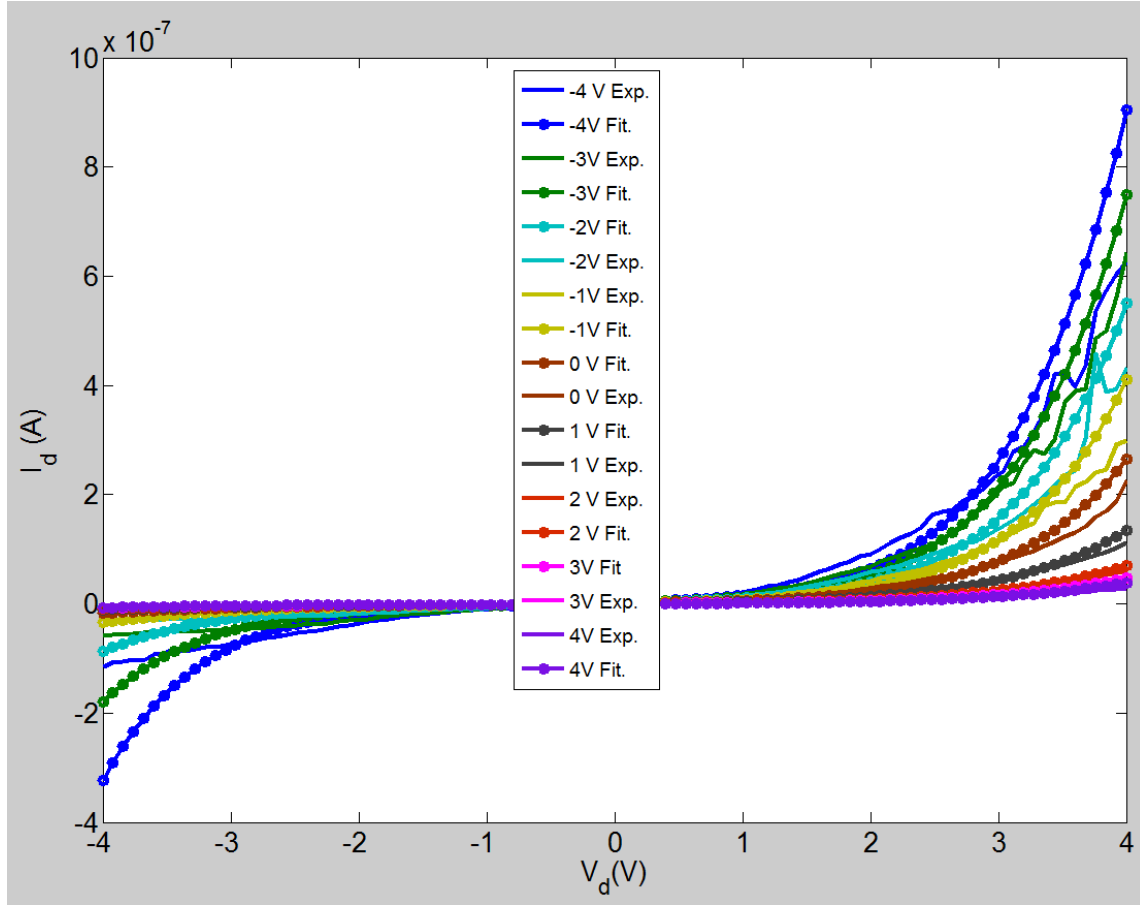

**Figure S-2.** Device I. Simulations for the output characteristics. (upper) Schematics of the device model and equivalent circuitries. (middle) Band diagram of the MOGS heterostructure indicating the Schottky Barrier Height  $\phi_b$ . (lower) Simulated I-V characteristics with varied  $V_G$  in sweeping of  $V_D$  from -4 to 4 V, performed using the parameters and equations above.

## 2. Graphene gated metal-GaSe-metal FET

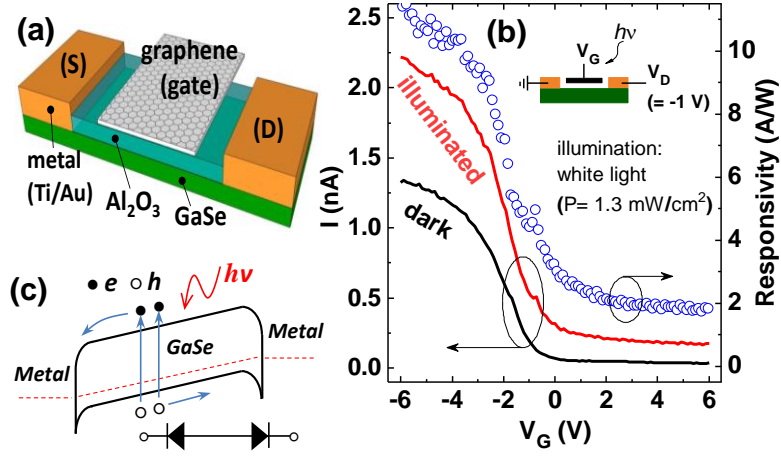

**Figure S-3.** (a) Schematic of graphene gated GaSe FET. (b) (left axis) Transfer characteristics of the device measured at  $V_D = -1 \text{ V}$ . A black and red lines denote the currents measured in dark and under illumination (white light,  $P = 0.16 \text{ mW}$ ). (right axis) Corresponding photo-responsivity ( $= I_{ph}/P_{channel}$ ) plotted with blue circles along  $V_G$ . The inset describes the cross-section view of device with electrical configuration.  $h\nu$  is the incident light energy. (c) Band diagram describing the photocurrent generation process in hole transport when the device is biased, including equivalent circuitry (back-to-back diode configuration).

### 3. Device II

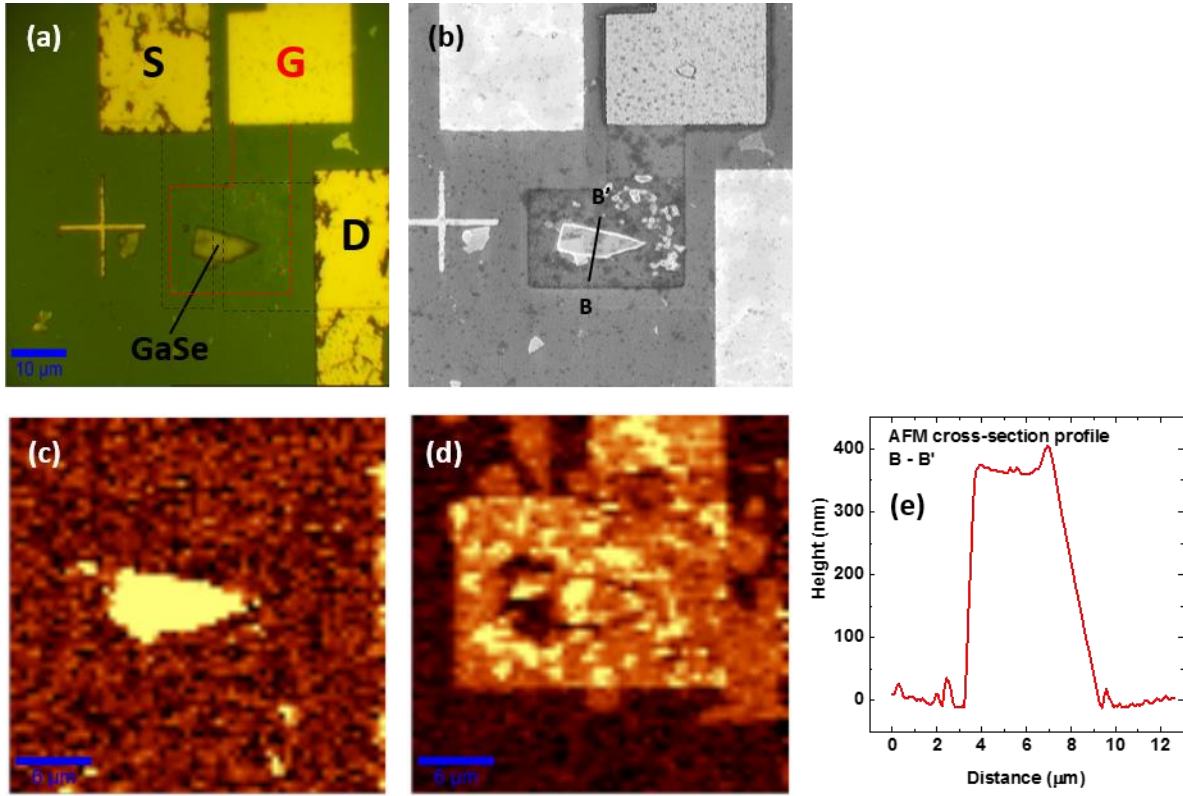

**Figure S-4.** Device II. (a-b) Optical and SEM image of the device. Dashed lines in black and red denote a graphene contact and a topgate, respectively. (c-d) Raman map for the peak of (c) GaSe appearing at  $\sim 212 \text{ cm}^{-1}$  ( $E_{12g}$ ) and (d) of the graphene at  $\sim 2680 \text{ cm}^{-1}$  (2D). (e) Height profile measured by AFM along the B-B' line in (b).

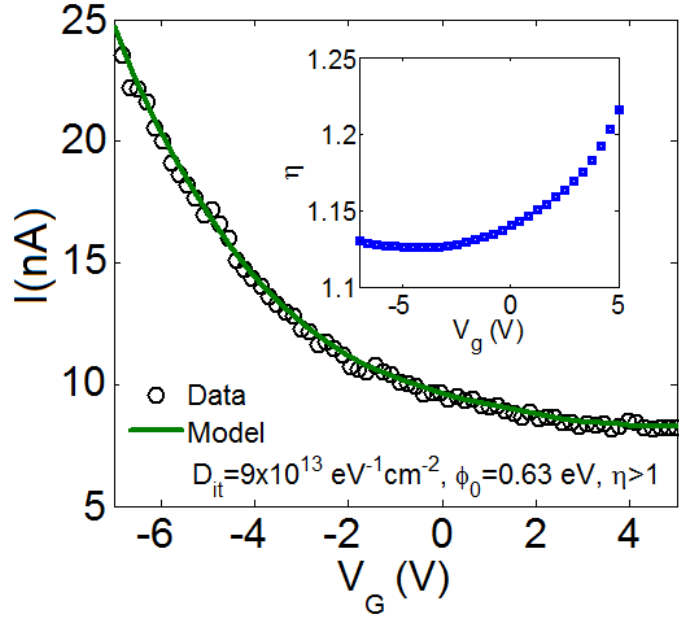

**Figure S-5.** Device II. Simulated transfer characteristics. The best fit to the measurements is reached when  $D_{it} \sim 10^{14} \text{ eV}^{-1}\text{cm}^{-2}$  and  $\phi_0 \sim E_g/3$  are assumed. To gain consistency with the experiment we have considered an ideality factor that depends on the gate bias, as shown in the inset.

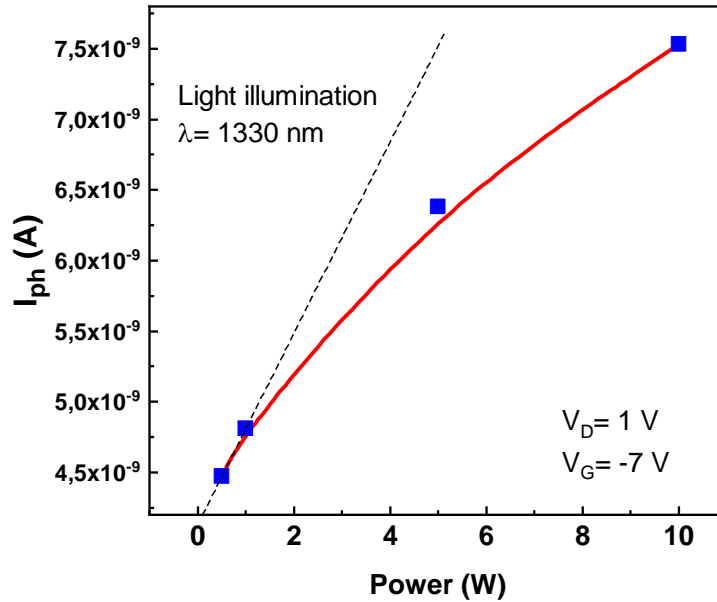

**Figure S-6.** Device II. Photogenerated current versus illuminated power at 1330 nm. The red line is a curve fitted to data obtained with the power ( $P$ ) = 0.5, 1, 5, 10 mW. The trend of linear curve-fit to points for  $P$  = 0.5 and 1 mW is shown with a dotted line.

## 4. Device III

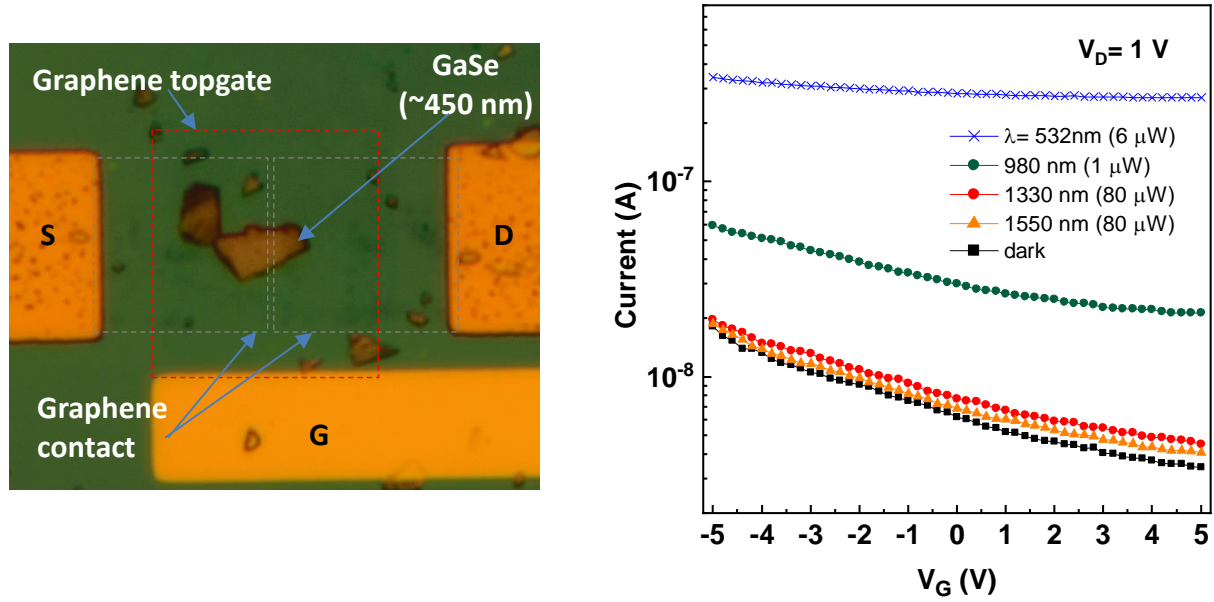

**Figure S-7.** Device III. (left) optical image of graphene-gated graphene-GaSe heterojunction structure. The channel size (width x length) of GaSe is  $6 \times 1 \mu\text{m}^2$ . (right) Transfer characteristics of the device under illumination.

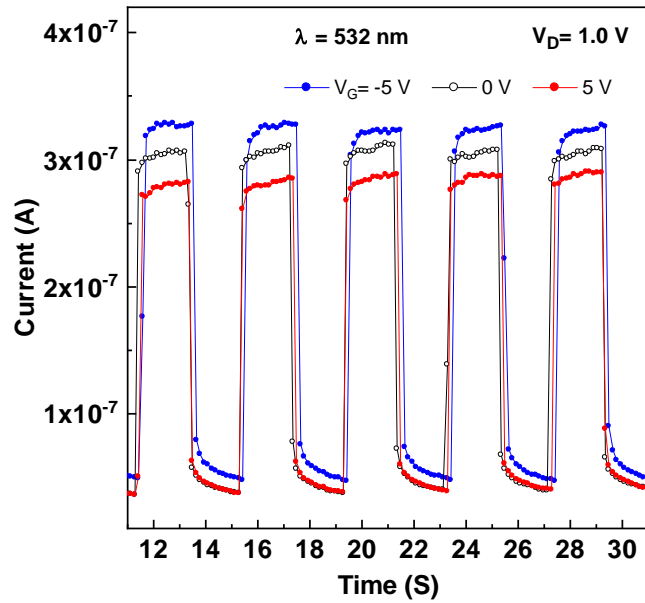



**Figure S-8.** Device III. Time-resolved photo-response of the device at 532 nm. Different colors denote the different gate voltages applied under illumination.

## 5. Graphene property

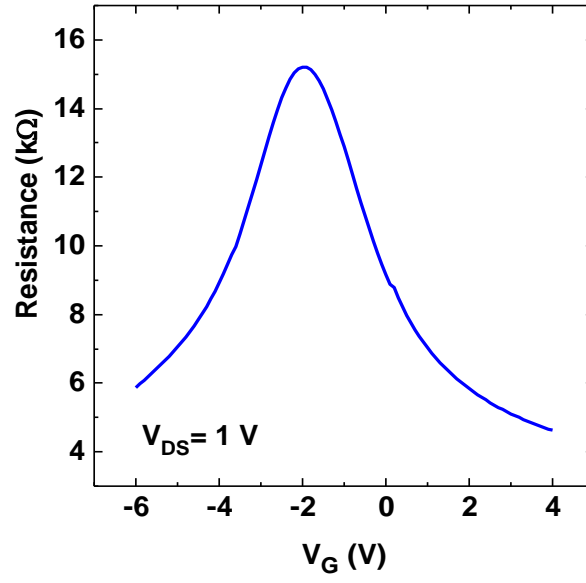

**Figure S-9.** Graphene FET. Total resistance versus  $V_G$ . Graphene is slightly n-type doped. The channel size of the graphene FET (width  $\times$  length) is  $30 \times 30 \mu\text{m}^2$ .
